# Supplementary material for: Breaking the mold: telescoping drives the evolution of more integrated and heterogeneous skulls in cetaceans
Source: PeerJ journal article supplement (doi:10.7717/peerj.13392), 2022-05-05
Supplement: R2-Buono__Vlachos_Suplemental_Data_S2.zip [file Bones Network Data.xlsx]

## Sheet: Bones R1
TAXA	BONE	DEGREE	H. CLOSENESS CENTRALITY	BETWEENESS CENTRALITY	CLUSTERING COEFFICIENT
Aetiocetus	AL_left	4	0.48039215686274517	6.67222	0.6666666666666666	MYSTI
Albertocetus	AL_left	5	0.47794117647058826	9.96523	0.5	ODON
Balaenoptera_acutorostrata	AL_left	3	0.40294117647058825	0	1.0	MYSTI
Caperea	AL_left	2	0.3921568627450981	0	1.0	MYSTI
Dorudon	Al_left	3	0.45833333333333337	0.458333	0.6666666666666666	ARCHAEO
Eubalaena	AL_left	5	0.49509803921568635	7.63123	0.5	MYSTI
Balaenoptera_musculus	AL_left	3	0.411764705882353	0	1.0	MYSTI
Notocetus	AL_left	5	0.46666666666666673	18.2462	0.3	ODON
Pakicetus	Al_left	7	0.5318627450980393	29.4378	0.3333333333333333	ARCHAEO
Physeter	AL_left	6	0.5277777777777777	11.3139	0.4666666666666667	ODON
Piscobalaena	AL_left	3	0.43627450980392163	0	1.0	MYSTI
Protocetidae	Al_left	6	0.519607843137255	8.37117	0.5333333333333333	ARCHAEO
Tursiops	AL_left	5	0.5049019607843137	26.7246	0.4	ODON
Waipatia	AL_left	5	0.5122549019607843	16.5857	0.5	ODON
Yamatocetus	AL_left	3	0.4534313725490198	1.65758	0.6666666666666666	MYSTI
Aetiocetus	AL_right	4	0.48039215686274517	6.67222	0.6666666666666666	MYSTI
Albertocetus	AL_right	5	0.4779411764705883	9.98471	0.5	ODON
Balaenoptera_acutorostrata	AL_right	3	0.4029411764705882	0	1.0	MYSTI
Caperea	AL_right	2	0.3921568627450981	0	1.0	MYSTI
Dorudon	Al_right	3	0.45833333333333337	0.458333	0.6666666666666666	ARCHAEO
Eubalaena	AL_right	5	0.49509803921568635	7.63123	0.5	MYSTI
Balaenoptera_musculus	AL_right	3	0.4117647058823529	0	1.0	MYSTI
Notocetus	AL_right	5	0.46666666666666673	18.2462	0.3	ODON
Pakicetus	Al_right	7	0.5318627450980393	29.4378	0.3333333333333333	ARCHAEO
Physeter	AL_right	6	0.5277777777777777	10.0605	0.4666666666666667	ODON
Piscobalaena	Al_right	3	0.4362745098039217	0	1.0	MYSTI
Protocetidae	Al_right	6	0.519607843137255	8.37117	0.5333333333333333	ARCHAEO
Tursiops	AL_right	5	0.5049019607843137	26.7246	0.4	ODON
Waipatia	AL_right	5	0.5122549019607843	16.5857	0.5	ODON
Yamatocetus	Al_right	3	0.4534313725490198	1.65758	0.6666666666666666	MYSTI
Aetiocetus	BE	5	0.48774509803921573	8.66667	0.6	MYSTI
Albertocetus	BE	7	0.5441176470588234	31.3154	0.42857142857142855	ODON
Balaenoptera_acutorostrata	BE	3	0.448529411764706	3.94545	0.6666666666666666	MYSTI
Caperea	BE	5	0.4975490196078431	7.61667	0.6	MYSTI
Dorudon	BE	5	0.5245098039215685	7.34734	0.4	ARCHAEO
Eubalaena	BE	3	0.4534313725490198	0.807692	0.6666666666666666	MYSTI
Balaenoptera_musculus	BE	3	0.448529411764706	3.75294	0.6666666666666666	MYSTI
Notocetus	BE	5	0.5220588235294118	12.2685	0.5	ODON
Pakicetus	BE	7	0.5686274509803921	32.8605	0.2857142857142857	ARCHAEO
Physeter	BE	7	0.558080808080808	12.4998	0.47619047619047616	ODON
Piscobalaena	BE	3	0.4583333333333334	4.60238	0.6666666666666666	MYSTI
Protocetidae	BE	10	0.5980392156862745	55.5868	0.3333333333333333	ARCHAEO
Tursiops	BE	7	0.5514705882352942	25.0254	0.47619047619047616	ODON
Waipatia	BE	9	0.5882352941176469	46.6204	0.3333333333333333	ODON
Yamatocetus	BE	3	0.43382352941176483	2.4	0.6666666666666666	MYSTI
Aetiocetus	BO	6	0.519607843137255	50.0333	0.3333333333333333	MYSTI
Albertocetus	BO	7	0.5098039215686274	36.0194	0.3333333333333333	ODON
Balaenoptera_acutorostrata	BO	8	0.5735294117647058	80.6235	0.10714285714285714	MYSTI
Caperea	BO	6	0.5294117647058822	27.5214	0.3333333333333333	MYSTI
Dorudon	BO	7	0.5539215686274509	40.3177	0.23809523809523808	ARCHAEO
Eubalaena	BO	6	0.5196078431372549	27.6092	0.2	MYSTI
Balaenoptera_musculus	BO	8	0.5735294117647058	61.3718	0.10714285714285714	MYSTI
Notocetus	BO	5	0.5049019607843137	15.552	0.3	ODON
Pakicetus	BO	4	0.5	30.5603	0.16666666666666666	ARCHAEO
Physeter	BO	5	0.5202020202020201	17.3132	0.4	ODON
Piscobalaena	BO	8	0.5588235294117646	68.1	0.17857142857142858	MYSTI
Protocetidae	BO	7	0.5147058823529411	29.64	0.38095238095238093	ARCHAEO
Tursiops	BO	5	0.4999999999999999	26.3119	0.4	ODON
Waipatia	BO	7	0.5245098039215685	23.0774	0.38095238095238093	ODON
Yamatocetus	BO	6	0.5098039215686275	36.7606	0.2	MYSTI
Taxon	Bones	Degree	Harmonic	Betweeness	Clustering	Group
Aetiocetus	ET	2	0.4004901960784314	0	1.0	MYSTI
Albertocetus	ET	7	0.519607843137255	21.4016	0.4666666666666667	ODON
Balaenoptera_acutorostrata	ET	6	0.5392156862745098	25.2019	0.3333333333333333	MYSTI
Caperea	ET	6	0.5441176470588236	24.2302	0.3333333333333333	MYSTI
Dorudon	ET	7	0.5686274509803922	18.0298	0.42857142857142855	ARCHAEO
Eubalaena	ET	6	0.5539215686274509	10.4958	0.4666666666666667	MYSTI
Balaenoptera_musculus	ET	6	0.5392156862745098	26.5503	0.2	MYSTI
Notocetus	ET	7	0.49264705882352944	2.45497	0.7333333333333333	ODON
Pakicetus	ET	7	0.5588235294117647	18.4096	0.42857142857142855	ARCHAEO
Physeter	ET	6	0.5176767676767676	9.2751	0.3	ODON
Piscobalaena	ET	2	0.42156862745098045	0	1.0	MYSTI
Protocetidae	ET	4	0.4730392156862746	0	1.0	ARCHAEO
Tursiops	ET	9	0.5612745098039216	18.1405	0.5	ODON
Waipatia	ET	5	0.4514705882352942	6.05476	0.3333333333333333	ODON
Yamatocetus	ET	4	0.5171568627450981	15.7398	0.3333333333333333	MYSTI
Aetiocetus	EX_left	4	0.4558823529411765	24.1333	0.16666666666666666	MYSTI
Albertocetus	EX_left	5	0.4553921568627451	19.4543	0.3	ODON
Balaenoptera_acutorostrata	EX_left	4	0.47058823529411764	5.98718	0.5	MYSTI
Caperea	EX_left	4	0.47058823529411775	13.1036	0.3333333333333333	MYSTI
Dorudon	EX_left	4	0.4534313725490197	5.49113	0.5	ARCHAEO
Eubalaena	EX_left	4	0.4730392156862746	13.7563	0.3333333333333333	MYSTI
Balaenoptera_musculus	EX_left	4	0.5049019607843137	8.68154	0.5	MYSTI
Notocetus	EX_left	5	0.49264705882352944	18.3348	0.4	ODON
Pakicetus	EX_left	4	0.44852941176470607	9.37537	0.3333333333333333	ARCHAEO
Physeter	EX_left	6	0.5252525252525252	19.8405	0.4	ODON
Piscobalaena	EX_left	4	0.46568627450980393	5.37024	0.5	MYSTI
Protocetidae	EX_left	4	0.4299019607843138	1.13942	0.6666666666666666	ARCHAEO
Tursiops	EX_left	5	0.465686274509804	24.1893	0.4	ODON
Waipatia	EX_left	5	0.465686274509804	5.581	0.6	ODON
Yamatocetus	EX_left	4	0.4583333333333335	14.2584	0.3333333333333333	MYSTI
Aetiocetus	EX_right	4	0.4558823529411765	24.1333	0.16666666666666666	MYSTI
Albertocetus	EX_right	5	0.4553921568627451	19.4415	0.3	ODON
Balaenoptera_acutorostrata	EX_right	4	0.47058823529411764	5.98718	0.5	MYSTI
Caperea	EX_right	4	0.47058823529411775	13.1036	0.3333333333333333	MYSTI
Dorudon	EX_right	4	0.4534313725490197	5.49113	0.5	ARCHAEO
Eubalaena	EX_right	4	0.4730392156862746	13.7563	0.3333333333333333	MYSTI
Balaenoptera_musculus	EX_right	4	0.5049019607843137	8.68154	0.5	MYSTI
Notocetus	EX_right	5	0.49264705882352944	18.3348	0.4	ODON
Pakicetus	EX_right	4	0.44852941176470607	9.37537	0.3333333333333333	ARCHAEO
Physeter	EX_right	6	0.5252525252525252	19.6066	0.4	ODON
Piscobalaena	EX_right	4	0.46568627450980393	5.37024	0.5	MYSTI
Protocetidae	EX_right	4	0.4299019607843138	1.13942	0.6666666666666666	ARCHAEO
Tursiops	EX_right	5	0.465686274509804	24.1893	0.4	ODON
Waipatia	EX_right	5	0.46568627450980393	5.581	0.6	ODON
Yamatocetus	EX_right	4	0.4583333333333335	14.2584	0.3333333333333333	MYSTI
Aetiocetus	FR_left	9	0.5833333333333331	116.617	0.16666666666666666	MYSTI
Albertocetus	FR_left	9	0.5906862745098039	92.5442	0.25	ODON
Balaenoptera_acutorostrata	FR_left	12	0.6519607843137254	134.944	0.19696969696969696	MYSTI
Caperea	FR_left	11	0.6323529411764705	114.725	0.18181818181818182	MYSTI
Dorudon	FR_left	13	0.6715686274509804	142.745	0.20512820512820512	ARCHAEO
Eubalaena	FR_left	13	0.6568627450980392	121.78	0.22727272727272727	MYSTI
Balaenoptera_musculus	FR_left	10	0.622549019607843	80.9694	0.24444444444444444	MYSTI
Notocetus	FR_left	11	0.6200980392156863	77.6601	0.2222222222222222	ODON
Pakicetus	FR_left	11	0.6225490196078431	76.3574	0.23636363636363636	ARCHAEO
Physeter	FR_left	11	0.6565656565656566	72.7215	0.2909090909090909	ODON
Piscobalaena	FR_left	6	0.5049019607843138	43.0282	0.26666666666666666	MYSTI
Protocetidae	FR_left	11	0.625	82.0156	0.2909090909090909	ARCHAEO
Tursiops	FR_left	11	0.6299019607843137	105.304	0.2545454545454545	ODON
Waipatia	FR_left	13	0.6495098039215685	141.249	0.19696969696969696	ODON
Yamatocetus	FR_left	11	0.627450980392157	125.223	0.14545454545454545	MYSTI
Aetiocetus	FR_right	9	0.5833333333333331	116.617	0.16666666666666666	MYSTI
Albertocetus	FR_right	9	0.5906862745098039	95.35	0.2222222222222222	ODON
Balaenoptera_acutorostrata	FR_right	12	0.6519607843137254	134.944	0.19696969696969696	MYSTI
Caperea	FR_right	11	0.6323529411764705	114.725	0.18181818181818182	MYSTI
Dorudon	FR_right	13	0.6715686274509804	142.745	0.20512820512820512	ARCHAEO
Eubalaena	FR_right	13	0.6568627450980392	121.78	0.22727272727272727	MYSTI
Balaenoptera_musculus	FR_right	10	0.622549019607843	80.9694	0.24444444444444444	MYSTI
Notocetus	FR_right	11	0.6200980392156863	77.6601	0.2222222222222222	ODON
Pakicetus	FR_right	11	0.6225490196078431	76.3574	0.23636363636363636	ARCHAEO
Physeter	FR_right	12	0.6717171717171717	88.8772	0.25757575757575757	ODON
Piscobalaena	FR_right	6	0.5049019607843138	43.0282	0.26666666666666666	MYSTI
Protocetidae	FR_right	11	0.625	82.0156	0.2909090909090909	ARCHAEO
Tursiops	FR_right	11	0.6299019607843137	105.304	0.2545454545454545	ODON
Waipatia	FR_right	13	0.6495098039215685	141.249	0.19696969696969696	ODON
Yamatocetus	FR_right	11	0.6274509803921569	125.223	0.14545454545454545	MYSTI
Aetiocetus	IP	1	0.31764705882352945	0	0.6	MYSTI
Albertocetus	IP	5	0.5098039215686275	24.4052	0.5	ODON
Balaenoptera_acutorostrata	IP	5	0.5318627450980391	8.35245	0.7	MYSTI
Caperea	IP	1	0.3848039215686276	0	0.7	MYSTI
Eubalaena	IP	1	0.37745098039215697	0	0.7	MYSTI
Balaenoptera_musculus	IP	5	0.5318627450980391	5.15714	0.7	MYSTI
Notocetus	IP	1	0.37990196078431376	0	0.7	ODON
Physeter	IP	1	0.40151515151515166	0	0.7	ODON
Piscobalaena	IP	3	0.44362745098039225	0	1.0	MYSTI
Tursiops	IP	1	0.3142156862745098	0	0.5	ODON
Waipatia	IP	1	0.3392156862745099	0	0.6	ODON
Yamatocetus	IP	1	0.3416666666666667	0	0.6	MYSTI
Aetiocetus	JU_left	3	0.4225490196078432	3.70952	0.3333333333333333	MYSTI
Albertocetus	JU_left	2	0.34950980392156866	0	1.0	ODON
Balaenoptera_acutorostrata	JU_left	3	0.44362745098039225	7.29583	0.6666666666666666	MYSTI
Caperea	JU_left	3	0.431372549019608	3.09286	0.3333333333333333	MYSTI
Dorudon	JU_left	3	0.4127450980392158	3.66711	0.3333333333333333	ARCHAEO
Eubalaena	JU_left	4	0.482843137254902	9.38232	0.5	MYSTI
Balaenoptera_musculus	JU_left	3	0.43872549019607854	3.21905	0.6666666666666666	MYSTI
Notocetus	JU_left	4	0.4617647058823531	5.73759	0.5	ODON
Pakicetus	JU_left	3	0.4289215686274511	9.96853	0.3333333333333333	ARCHAEO
Physeter	JU_left	4	0.4772727272727274	1.33651	0.8333333333333334	ODON
Piscobalaena	JU_left	3	0.4436274509803923	4.52587	0.3333333333333333	MYSTI
Protocetidae	JU_left	3	0.46078431372549034	21.9609	0.3333333333333333	ARCHAEO
Tursiops	JU_left	3	0.4250000000000001	14.4683	0.3333333333333333	ODON
Waipatia	JU_left	3	0.4534313725490198	11.0047	0.3333333333333333	ODON
Yamatocetus	JU_left	3	0.4387254901960786	4.85	0.3333333333333333	MYSTI
Aetiocetus	JU_right	3	0.4225490196078432	3.70952	0.3333333333333333	MYSTI
Albertocetus	JU_right	2	0.34950980392156866	0	1.0	ODON
Balaenoptera_acutorostrata	JU_right	3	0.44362745098039225	7.29583	0.6666666666666666	MYSTI
Caperea	JU_right	3	0.431372549019608	3.09286	0.3333333333333333	MYSTI
Dorudon	JU_right	3	0.4127450980392158	3.66711	0.3333333333333333	ARCHAEO
Eubalaena	JU_right	4	0.482843137254902	9.38232	0.5	MYSTI
Balaenoptera_musculus	JU_right	3	0.43872549019607854	3.21905	0.6666666666666666	MYSTI
Notocetus	JU_right	4	0.4617647058823531	5.73759	0.5	ODON
Pakicetus	JU_right	3	0.42892156862745107	9.96853	0.3333333333333333	ARCHAEO
Physeter	JU_right	4	0.4772727272727274	0.916201	0.8333333333333334	ODON
Piscobalaena	JU_right	3	0.4436274509803923	4.52587	0.3333333333333333	MYSTI
Protocetidae	JU_right	3	0.46078431372549034	21.9609	0.3333333333333333	ARCHAEO
Tursiops	JU_right	3	0.4250000000000001	1.44683	0.3333333333333333	ODON
Waipatia	JU_right	3	0.4534313725490198	11.0047	0.3333333333333333	ODON
Yamatocetus	JU_right	3	0.4387254901960786	4.85	0.3333333333333333	MYSTI
Aetiocetus	LA_left	3	0.4338235294117649	1.95238	0.6666666666666666	MYSTI
Albertocetus	LA_left	3	0.4151960784313727	11.6976	0.3333333333333333	ODON
Balaenoptera_acutorostrata	LA_left	2	0.3661764705882354	0	1.0	MYSTI
Caperea	LA_left	3	0.44117647058823545	1.75417	0.6666666666666666	MYSTI
Dorudon	LA_left	3	0.448529411764706	3.24848	0.6666666666666666	ARCHAEO
Eubalaena	LA_left	2	0.3882352941176472	0	1.0	MYSTI
Balaenoptera_musculus	LA_left	2	0.38725490196078444	0	1.0	MYSTI
Notocetus	LA_left	4	0.4323529411764708	0	1.0	ODON
Pakicetus	LA_left	3	0.44117647058823545	3.01389	0.6666666666666666	ARCHAEO
Physeter	LA_left	4	0.4772727272727274	1.33651	0.8333333333333334	ODON
Piscobalaena	LA_left	3	0.4191176470588237	0.666667	0.6666666666666666	MYSTI
Protocetidae	LA_left	4	0.4583333333333335	3.04583	0.6666666666666666	ARCHAEO
Tursiops	LA_left	3	0.4397058823529413	2.13571	0.6666666666666666	ODON
Waipatia	LA_left	4	0.43480392156862757	1.38333	0.6666666666666666	ODON
Yamatocetus	LA_left	3	0.4387254901960786	1.84848	0.6666666666666666	MYSTI
Aetiocetus	LA_right	3	0.4338235294117649	1.95238	0.6666666666666666	MYSTI
Albertocetus	LA_right	3	0.4151960784313727	12.344	0.3333333333333333	ODON
Balaenoptera_acutorostrata	LA_right	2	0.3661764705882354	0	1.0	MYSTI
Caperea	LA_right	3	0.44117647058823545	1.75417	0.6666666666666666	MYSTI
Dorudon	LA_right	3	0.448529411764706	3.24848	0.6666666666666666	ARCHAEO
Eubalaena	LA_right	2	0.3882352941176472	0	1.0	MYSTI
Balaenoptera_musculus	LA_right	2	0.38725490196078444	0	1.0	ODON
Notocetus	LA_right	4	0.4323529411764707	0	1.0	ODON
Pakicetus	LA_right	3	0.44117647058823545	3.01389	0.6666666666666666	ARCHAEO
Physeter	LA_right	4	0.4772727272727274	0.916201	0.8333333333333334	ODON
Piscobalaena	LA_right	3	0.4191176470588237	0.666667	0.6666666666666666	MYSTI
Protocetidae	LA_right	4	0.4583333333333335	3.04583	0.6666666666666666	ARCHAEO
Tursiops	LA_right	3	0.4397058823529413	2.13571	0.6666666666666666	ODON
Waipatia	LA_right	4	0.43480392156862757	1.38333	0.6666666666666666	ODON
Yamatocetus	LA_right	3	0.4387254901960786	1.84848	0.6666666666666666	MYSTI
Dorudon	Mst	4	0.5245098039215687	1.56401	0.6666666666666666	ARCHAEO
Pakicetus	Mst	4	0.5	1.23294	0.6666666666666666	ARCHAEO
Protocetidae	Mst	4	0.4730392156862746	0	1.0	ARCHAEO
Aetiocetus	MX_left	7	0.5441176470588235	46.846	0.2857142857142857	MYSTI
Albertocetus	MX_left	5	0.47303921568627466	29.5786	0.3	ODON
Balaenoptera_acutorostrata	MX_left	7	0.5416666666666669	39.7027	0.3333333333333333	MYSTI
Caperea	MX_left	7	0.5465686274509803	30.2716	0.3333333333333333	MYSTI
Dorudon	MX_left	7	0.5367647058823528	28.7093	0.3333333333333333	ARCHAEO
Eubalaena	MX_left	9	0.5710784313725491	48.6141	0.2857142857142857	MYSTI
Balaenoptera_musculus	MX_left	8	0.5882352941176472	51.22	0.32142857142857145	MYSTI
Notocetus	MX_left	10	0.5955882352941176	43.9443	0.3333333333333333	ODON
Pakicetus	MX_left	7	0.5294117647058822	29.7448	0.3333333333333333	ARCHAEO
Physeter	MX_left	11	0.6414141414141413	67.9138	0.2545454545454545	ODON
Piscobalaena	MX_left	9	0.5980392156862745	96.4266	0.2222222222222222	MYSTI
Protocetidae	MX_left	8	0.5441176470588235	35.6518	0.35714285714285715	ARCHAEO
Tursiops	MX_left	8	0.5563725490196079	47.1802	0.2857142857142857	ODON
Waipatia	MX_left	6	0.5058823529411766	7.14359	0.4666666666666667	ODON
Yamatocetus	MX_left	8	0.5637254901960784	45.0905	0.2857142857142857	MYSTI
Aetiocetus	MX_right	7	0.5441176470588235	46.846	0.2857142857142857	MYSTI
Albertocetus	MX_right	5	0.4681372549019609	28.9321	0.3	ODON
Balaenoptera_acutorostrata	MX_right	7	0.5416666666666669	39.7027	0.3333333333333333	MYSTI
Caperea	MX_right	7	0.5465686274509803	30.2716	0.3333333333333333	MYSTI
Dorudon	MX_right	7	0.5367647058823529	28.7093	0.3333333333333333	ARCHAEO
Eubalaena	MX_right	9	0.5710784313725491	48.6141	0.2857142857142857	MYSTI
Balaenoptera_musculus	MX_right	8	0.5882352941176472	51.22	0.32142857142857145	MYSTI
Notocetus	MX_right	10	0.5955882352941176	43.9443	0.3333333333333333	ODON
Pakicetus	MX_right	7	0.5294117647058822	29.7448	0.3333333333333333	ARCHAEO
Physeter	MX_right	10	0.6212121212121212	46.308	0.3111111111111111	ODON
Piscobalaena	MX_right	9	0.5980392156862745	96.4266	0.2222222222222222	MYSTI
Protocetidae	MX_right	8	0.5441176470588235	35.6518	0.35714285714285715	ARCHAEO
Tursiops	MX_right	8	0.5563725490196079	47.1802	0.2857142857142857	ODON
Waipatia	MX_right	6	0.5058823529411766	7.14359	0.4666666666666667	ODON
Yamatocetus	MX_right	8	0.5637254901960784	45.0905	0.2857142857142857	MYSTI
Aetiocetus	NA_left	2	0.4068627450980393	0	1.0	MYSTI
Albertocetus	NA_left	4	0.43480392156862757	3.49329	0.5	ODON
Balaenoptera_acutorostrata	NA_left	4	0.4607843137254903	3.22778	0.5	MYSTI
Caperea	NA_left	4	0.4583333333333335	3.33889	0.5	MYSTI
Dorudon	NA_left	4	0.4730392156862746	4.55099	0.5	ARCHAEO
Eubalaena	NA_left	5	0.49264705882352944	4.55	0.5	MYSTI
Balaenoptera_musculus	NA_left	4	0.4803921568627453	2.05931	0.5	MYSTI
Notocetus	NA_left	6	0.5073529411764706	11.7306	0.4666666666666667	ODON
Pakicetus	NA_left	4	0.45588235294117657	3.4873	0.5	ARCHAEO
Physeter	NA_left	3	0.46212121212121227	2.5	0.3333333333333333	ODON
Piscobalaena	NA_left	4	0.44362745098039225	7.72273	0.3333333333333333	MYSTI
Protocetidae	NA_left	4	0.44950980392156875	1.83333	0.6666666666666666	ARCHAEO
Tursiops	NA_left	4	0.46176470588235297	4.11786	0.5	ODON
Waipatia	NA_left	4	0.4568627450980393	6.70725	0.3333333333333333	ODON
Yamatocetus	NA_left	3	0.43627450980392174	4.93268	0.3333333333333333	MYSTI
Aetiocetus	NA_right	2	0.40686274509803927	0	1.0	MYSTI
Albertocetus	NA_right	3	0.4151960784313726	1.78759	0.6666666666666666	ODON
Balaenoptera_acutorostrata	NA_right	4	0.4607843137254903	3.22778	0.5	MYSTI
Caperea	NA_right	4	0.4583333333333335	3.33889	0.5	MYSTI
Dorudon	NA_right	4	0.4730392156862746	4.55099	0.5	ARCHAEO
Eubalaena	NA_right	5	0.49264705882352944	4.55	0.5	MYSTI
Balaenoptera_musculus	NA_right	4	0.4803921568627453	2.05931	0.5	MYSTI
Notocetus	NA_right	6	0.5073529411764706	11.7306	0.4666666666666667	ODON
Pakicetus	NA_right	4	0.45588235294117657	3.4873	0.5	ARCHAEO
Piscobalaena	NA_right	4	0.44362745098039225	7.72273	0.3333333333333333	MYSTI
Protocetidae	NA_right	4	0.44950980392156875	1.83333	0.6666666666666666	ARCHAEO
Tursiops	NA_right	4	0.46176470588235297	4.11786	0.5	ODON
Waipatia	NA_right	4	0.45686274509803926	6.70725	0.3333333333333333	ODON
Yamatocetus	NA_right	3	0.4362745098039217	4.93268	0.3333333333333333	MYSTI
Aetiocetus	OR_left	1	0.36764705882352944	0	0.0	MYSTI
Albertocetus	OR_left	3	0.44117647058823534	7.14286	0.6666666666666666	ODON
Balaenoptera_acutorostrata	OR_left	1	0.39460784313725494	0	0.0	MYSTI
Caperea	OR_left	1	0.3872549019607844	0	0.0	MYSTI
Dorudon	OR_left	2	0.42892156862745107	0	1.0	ARCHAEO
Eubalaena	OR_left	1	0.39705882352941185	0	0.0	MYSTI
Balaenoptera_musculus	OR_left	1	0.38480392156862747	0	0.0	MYSTI
Notocetus	OR_left	3	0.4754901960784314	12.8986	0.0	ODON
Pakicetus	OR_left	5	0.5073529411764706	5.09329	0.5	ARCHAEO
Physeter	OR_left	2	0.45202020202020204	0.625	0.0	ODON
Piscobalaena	OR_left	1	0.3352941176470588	0	0.0	MYSTI
Protocetidae	OR_left	3	0.44607843137254904	0	1.0	ARCHAEO
Tursiops	OR_left	2	0.4200980392156863	0.727778	0.0	ODON
Waipatia	OR_left	2	0.42745098039215684	1.4	0.0	ODON
Yamatocetus	OR_left	1	0.3848039215686275	0	0.0	MYSTI
Aetiocetus	OR_right	1	0.36764705882352944	0	0.0	MYSTI
Albertocetus	OR_right	3	0.44117647058823534	7.09635	0.6666666666666666	ODON
Balaenoptera_acutorostrata	OR_right	1	0.39460784313725494	0	0.0	MYSTI
Caperea	OR_right	1	0.3872549019607844	0	0.0	MYSTI
Dorudon	OR_right	2	0.42892156862745107	0	1.0	ARCHAEO
Eubalaena	OR_right	1	0.39705882352941185	0	0.0	MYSTI
Balaenoptera_musculus	OR_right	1	0.38480392156862747	0	0.0	MYSTI
Notocetus	OR_right	3	0.4754901960784314	12.8986	0.0	ODON
Pakicetus	OR_right	5	0.5073529411764706	5.09329	0.5	ARCHAEO
Physeter	OR_right	2	0.45202020202020204	0.51452	0.0	ODON
Piscobalaena	OR_right	1	0.33529411764705885	0	0.0	MYSTI
Protocetidae	OR_right	3	0.44607843137254904	0	1.0	ARCHAEO
Tursiops	OR_right	2	0.4200980392156863	0.727778	0.0	ODON
Waipatia	OR_right	2	0.42745098039215684	1.4	0.0	ODON
Yamatocetus	OR_right	1	0.3848039215686275	0	0.0	MYSTI
Aetiocetus	PA_left	5	0.49264705882352944	31.7857	0.4	MYSTI
Albertocetus	PA_left	6	0.5122549019607844	33.1599	0.3333333333333333	ODON
Balaenoptera_acutorostrata	PA_left	6	0.5171568627450981	16.6355	0.5333333333333333	MYSTI
Caperea	PA_left	5	0.5196078431372549	20.3095	0.5	MYSTI
Dorudon	PA_left	7	0.5539215686274509	34.713	0.3333333333333333	ARCHAEO
Eubalaena	PA_left	4	0.48774509803921584	2	0.8333333333333334	MYSTI
Balaenoptera_musculus	PA_left	6	0.5343137254901961	16.3624	0.5333333333333333	MYSTI
Notocetus	PA_left	5	0.49754901960784315	17.6526	0.4	ODON
Pakicetus	PA_left	6	0.5318627450980393	26.3113	0.3333333333333333	ARCHAEO
Physeter	PA_left	5	0.5101010101010102	2.89683	0.7	ODON
Piscobalaena	PA_left	8	0.5686274509803922	56.1391	0.32142857142857145	MYSTI
Protocetidae	PA_left	6	0.5441176470588235	27.1234	0.4	ARCHAEO
Tursiops	PA_left	5	0.5049019607843137	41.4488	0.4	ODON
Waipatia	PA_left	8	0.573529411764706	62.2124	0.39285714285714285	ODON
Yamatocetus	PA_left	5	0.5073529411764707	21.0333	0.4	MYSTI
Aetiocetus	PA_right	5	0.4926470588235295	31.7857	0.4	MYSTI
Albertocetus	PA_right	6	0.5122549019607844	33.0679	0.3333333333333333	ODON
Balaenoptera_acutorostrata	PA_right	6	0.5171568627450981	16.6355	0.5333333333333333	MYSTI
Caperea	PA_right	5	0.5196078431372549	20.3095	0.5	MYSTI
Dorudon	PA_right	7	0.5539215686274509	34.713	0.3333333333333333	ARCHAEO
Eubalaena	PA_right	4	0.48774509803921573	2	0.8333333333333334	MYSTI
Balaenoptera_musculus	PA_right	6	0.5343137254901961	16.3624	0.5333333333333333	MYSTI
Notocetus	PA_right	5	0.49754901960784315	17.6526	0.4	ODON
Pakicetus	PA_right	6	0.5318627450980393	26.3113	0.3333333333333333	ARCHAEO
Physeter	PA_right	5	0.5151515151515152	3.23016	0.7	ODON
Piscobalaena	PA_right	8	0.5686274509803922	56.1391	0.32142857142857145	MYSTI
Protocetidae	PA_right	6	0.5441176470588235	27.1234	0.4	ARCHAEO
Tursiops	PA_right	5	0.5049019607843137	41.4488	0.4	ODON
Waipatia	PA_right	8	0.573529411764706	62.2124	0.39285714285714285	ODON
Yamatocetus	PA_right	5	0.5073529411764707	21.0333	0.4	MYSTI
Aetiocetus	PE	3	0.4151960784313726	0.5	0.6666666666666666	MYSTI
Albertocetus	PE	3	0.4583333333333334	1.72303	0.6666666666666666	ODON
Balaenoptera_acutorostrata	PE	3	0.4362745098039217	1.95833	0.6666666666666666	MYSTI
Caperea	PE	3	0.448529411764706	1.66667	0.6666666666666666	MYSTI
Dorudon	PE	7	0.5833333333333334	20.7304	0.38095238095238093	ARCHAEO
Eubalaena	PE	7	0.5686274509803921	26.0046	0.3333333333333333	MYSTI
Balaenoptera_musculus	PE	3	0.4362745098039217	2.07778	0.6666666666666666	MYSTI
Notocetus	PE	9	0.5612745098039216	38.1069	0.3333333333333333	ODON
Pakicetus	PE	9	0.6078431372549019	56.7116	0.3055555555555556	ARCHAEO
Physeter	PE	9	0.5858585858585859	30.3667	0.3055555555555556	ODON
Piscobalaena	PE	5	0.465686274509804	11.0199	0.3	MYSTI
Protocetidae	PE	8	0.5833333333333334	67.6715	0.32142857142857145	ARCHAEO
Tursiops	PE	7	0.5230392156862743	17.9794	0.42857142857142855	ODON
Waipatia	PE	5	0.5073529411764705	15.564	0.2	ODON
Yamatocetus	PE	3	0.4348039215686275	1.48182	0.6666666666666666	MYSTI
Aetiocetus	PL_left	3	0.4470588235294118	0.7	0.6666666666666666	MYSTI
Albertocetus	PL_left	4	0.4754901960784315	7.78452	0.5	ODON
Balaenoptera_acutorostrata	PL_left	5	0.5196078431372549	12.3508	0.4	MYSTI
Caperea	PL_left	5	0.5122549019607843	8.65952	0.4	MYSTI
Dorudon	PL_left	6	0.5318627450980392	18.4164	0.3333333333333333	ARCHAEO
Eubalaena	PL_left	5	0.49754901960784315	9.67302	0.4	MYSTI
Balaenoptera_musculus	PL_left	5	0.5147058823529412	10.318	0.4	MYSTI
Notocetus	PL_left	6	0.5122549019607843	5.68095	0.6	ODON
Pakicetus	PL_left	6	0.5318627450980392	14.799	0.3333333333333333	ARCHAEO
Physeter	PL_left	4	0.47979797979797995	2.61905	0.6666666666666666	ODON
Piscobalaena	PL_left	4	0.48774509803921573	8.05714	0.5	MYSTI
Protocetidae	PL_left	5	0.4999999999999999	6.86706	0.5	ARCHAEO
Tursiops	PL_left	5	0.4936274509803922	3.96667	0.6	ODON
Waipatia	PL_left	5	0.4936274509803922	3.65274	0.6	ODON
Yamatocetus	PL_left	5	0.5049019607843137	9.88853	0.4	MYSTI
Aetiocetus	PL_right	3	0.4470588235294118	0.7	0.6666666666666666	MYSTI
Albertocetus	PL_right	4	0.4754901960784315	7.78452	0.5	ODON
Balaenoptera_acutorostrata	PL_right	5	0.5196078431372549	12.3508	0.4	MYSTI
Caperea	PL_right	5	0.5122549019607843	8.65952	0.4	MYSTI
Dorudon	PL_right	6	0.5318627450980393	18.4164	0.3333333333333333	ARCHAEO
Eubalaena	PL_right	5	0.49754901960784315	9.67302	0.4	MYSTI
Balaenoptera_musculus	PL_right	5	0.5147058823529412	10.318	0.4	MYSTI
Notocetus	PL_right	6	0.5122549019607843	5.68095	0.6	ODON
Pakicetus	PL_right	6	0.5318627450980393	14.799	0.3333333333333333	ARCHAEO
Physeter	PL_right	4	0.47474747474747486	2.30087	0.6666666666666666	ODON
Piscobalaena	PL_right	4	0.48774509803921573	8.05714	0.5	MYSTI
Protocetidae	PL_right	5	0.5	6.86706	0.5	ARCHAEO
Tursiops	PL_right	5	0.4936274509803922	3.96667	0.6	ODON
Waipatia	PL_right	5	0.4936274509803922	3.65274	0.6	ODON
Yamatocetus	PL_right	5	0.5049019607843137	9.88853	0.4	MYSTI
Aetiocetus	PMX_left	5	0.5098039215686274	20.9492	0.4	MYSTI
Albertocetus	PMX_left	5	0.49509803921568635	9.49549	0.4	ODON
Balaenoptera_acutorostrata	PMX_left	5	0.5073529411764707	8.05813	0.4	MYSTI
Caperea	PMX_left	5	0.5122549019607844	8.51091	0.4	MYSTI
Dorudon	PMX_left	4	0.45931372549019617	4.87329	0.5	ARCHAEO
Eubalaena	PMX_left	5	0.5171568627450981	5.88956	0.5	MYSTI
Balaenoptera_musculus	PMX_left	5	0.5245098039215688	5.18709	0.5	MYSTI
Notocetus	PMX_left	6	0.5098039215686274	4.3566	0.6666666666666666	ODON
Pakicetus	PMX_left	4	0.4583333333333335	5.09881	0.5	ARCHAEO
Physeter	PMX_left	3	0.4646464646464647	1.36667	0.6666666666666666	ODON
Piscobalaena	PMX_left	3	0.4632352941176472	2.2921	0.6666666666666666	MYSTI
Protocetidae	PMX_left	4	0.44558823529411784	3.16786	0.5	ARCHAEO
Tursiops	PMX_left	3	0.4357843137254903	1.34524	0.6666666666666666	ODON
Waipatia	PMX_left	5	0.49117647058823527	4.67976	0.5	ODON
Yamatocetus	PMX_left	5	0.5098039215686274	12.8145	0.4	MYSTI
Aetiocetus	PMX_right	5	0.5098039215686275	20.9492	0.4	MYSTI
Albertocetus	PMX_right	4	0.48039215686274517	4.34167	0.5	ODON
Balaenoptera_acutorostrata	PMX_right	5	0.5073529411764707	8.05813	0.4	MYSTI
Caperea	PMX_right	5	0.5122549019607844	8.51091	0.4	MYSTI
Dorudon	PMX_right	4	0.45931372549019617	4.87329	0.5	ARCHAEO
Eubalaena	PMX_right	5	0.5171568627450981	5.88956	0.5	MYSTI
Balaenoptera_musculus	PMX_right	5	0.5245098039215688	5.18709	0.5	MYSTI
Notocetus	PMX_right	6	0.5098039215686274	4.3566	0.6666666666666666	ODON
Pakicetus	PMX_right	4	0.4583333333333334	5.09881	0.5	ARCHAEO
Physeter	PMX_right	5	0.5126262626262627	6.0664	0.5	ODON
Piscobalaena	PMX_right	3	0.4632352941176472	2.2921	0.6666666666666666	MYSTI
Protocetidae	PMX_right	4	0.44558823529411784	3.16786	0.5	ARCHAEO
Tursiops	PMX_right	3	0.4357843137254903	1.34524	0.6666666666666666	ODON
Waipatia	PMX_right	5	0.49117647058823527	4.67976	0.5	ODON
Yamatocetus	PMX_right	5	0.5098039215686274	12.8145	0.4	MYSTI
Aetiocetus	PT_left	6	0.5147058823529412	32.6873	0.3333333333333333	MYSTI
Albertocetus	PT_left	6	0.5294117647058822	43.3187	0.4	ODON
Balaenoptera_acutorostrata	PT_left	6	0.5318627450980392	33.3398	0.3333333333333333	MYSTI
Caperea	PT_left	7	0.5367647058823528	33.5536	0.2857142857142857	MYSTI
Dorudon	PT_left	6	0.5294117647058824	20.2055	0.26666666666666666	ARCHAEO
Eubalaena	PT_left	6	0.5294117647058825	15.9565	0.3333333333333333	MYSTI
Balaenoptera_musculus	PT_left	6	0.5220588235294118	26.5162	0.3333333333333333	MYSTI
Notocetus	PT_left	8	0.5710784313725491	50.1895	0.2857142857142857	ODON
Pakicetus	PT_left	5	0.517156862745098	13.3939	0.3	ARCHAEO
Physeter	PT_left	9	0.601010101010101	24.5135	0.4444444444444444	ODON
Piscobalaena	PT_left	6	0.5367647058823528	30.3656	0.3333333333333333	MYSTI
Protocetidae	PT_left	7	0.5637254901960784	31.2048	0.38095238095238093	ARCHAEO
Tursiops	PT_left	9	0.5833333333333333	28.2929	0.4722222222222222	ODON
Waipatia	PT_left	6	0.5392156862745098	14.1942	0.4666666666666667	ODON
Yamatocetus	PT_left	4	0.48774509803921573	11.3199	0.3333333333333333	MYSTI
Aetiocetus	PT_right	6	0.5147058823529412	32.6873	0.3333333333333333	MYSTI
Albertocetus	PT_right	6	0.5294117647058822	43.475	0.4	ODON
Balaenoptera_acutorostrata	PT_right	6	0.5318627450980392	33.3398	0.3333333333333333	MYSTI
Caperea	PT_right	7	0.5367647058823528	33.5536	0.2857142857142857	MYSTI
Dorudon	PT_right	6	0.5294117647058824	20.2055	0.26666666666666666	ARCHAEO
Eubalaena	PT_right	6	0.5294117647058825	15.9565	0.3333333333333333	MYSTI
Balaenoptera_musculus	PT_right	6	0.5220588235294118	26.5162	0.3333333333333333	MYSTI
Notocetus	PT_right	8	0.5710784313725491	50.1895	0.2857142857142857	ODON
Pakicetus	PT_right	5	0.517156862745098	13.3939	0.3	ARCHAEO
Physeter	PT_right	9	0.595959595959596	22.4308	0.4444444444444444	ODON
Piscobalaena	PT_right	6	0.5367647058823528	30.3656	0.3333333333333333	MYSTI
Protocetidae	PT_right	7	0.5637254901960784	31.2048	0.38095238095238093	ARCHAEO
Tursiops	PT_right	9	0.5833333333333333	28.2929	0.4722222222222222	ODON
Waipatia	PT_right	6	0.5392156862745098	14.1942	0.4666666666666667	ODON
Yamatocetus	PT_right	4	0.48774509803921573	11.3199	0.3333333333333333	MYSTI
Aetiocetus	SOC	5	0.465686274509804	47.4333	0.1	MYSTI
Albertocetus	SOC	5	0.4681372549019609	27.2172	0.3	ODON
Balaenoptera_acutorostrata	SOC	9	0.6078431372549019	84.8793	0.3055555555555556	MYSTI
Caperea	SOC	9	0.6176470588235294	104.846	0.25	MYSTI
Dorudon	SOC	5	0.4852941176470588	6.71905	0.5	ARCHAEO
Eubalaena	SOC	9	0.6029411764705881	94.2255	0.25	MYSTI
Balaenoptera_musculus	SOC	15	0.7107843137254901	173.925	0.19047619047619047	MYSTI
Notocetus	SOC	9	0.6078431372549018	95.9486	0.2222222222222222	ODON
Pakicetus	SOC	6	0.5098039215686275	35.3315	0.3333333333333333	ARCHAEO
Physeter	SOC	11	0.6616161616161615	113.336	0.2545454545454545	ODON
Piscobalaena	SOC	7	0.5294117647058822	37.0866	0.3333333333333333	MYSTI
Protocetidae	SOC	6	0.5049019607843137	23.591	0.3333333333333333	ARCHAEO
Tursiops	SOC	5	0.4583333333333334	40.9071	0.3	ODON
Waipatia	SOC	7	0.5171568627450981	54.3878	0.38095238095238093	ODON
Yamatocetus	SOC	7	0.5220588235294118	64.8303	0.23809523809523808	MYSTI
Aetiocetus	SQ_left	7	0.5245098039215685	49.7341	0.23809523809523808	MYSTI
Albertocetus	SQ_left	6	0.4779411764705883	33.8973	0.26666666666666666	ODON
Balaenoptera_acutorostrata	SQ_left	6	0.4828431372549021	13.7096	0.4	MYSTI
Caperea	SQ_left	7	0.5490196078431372	45.0988	0.2857142857142857	MYSTI
Dorudon	SQ_left	6	0.5122549019607843	50.108	0.2	ARCHAEO
Eubalaena	SQ_left	8	0.5612745098039216	43.7923	0.32142857142857145	MYSTI
Balaenoptera_musculus	SQ_left	6	0.517156862745098	20.1587	0.4	MYSTI
Notocetus	SQ_left	6	0.4852941176470588	25.4051	0.26666666666666666	ODON
Pakicetus	SQ_left	7	0.5147058823529411	33.4119	0.2857142857142857	ARCHAEO
Physeter	SQ_left	8	0.5555555555555556	29.9651	0.39285714285714285	ODON
Piscobalaena	SQ_left	8	0.5318627450980393	38.2226	0.25	MYSTI
Protocetidae	SQ_left	9	0.5661764705882353	67.075	0.3055555555555556	ARCHAEO
Tursiops	SQ_left	5	0.4534313725490197	44.5048	0.2	ODON
Waipatia	SQ_left	6	0.47794117647058826	45.0025	0.26666666666666666	ODON
Yamatocetus	SQ_left	7	0.5441176470588234	62.495	0.19047619047619047	MYSTI
Aetiocetus	SQ_right	7	0.5245098039215685	49.7341	0.23809523809523808	MYSTI
Albertocetus	SQ_right	6	0.4779411764705883	33.9101	0.26666666666666666	ODON
Balaenoptera_acutorostrata	SQ_right	6	0.4828431372549021	13.7096	0.4	MYSTI
Caperea	SQ_right	7	0.5490196078431372	45.0988	0.2857142857142857	MYSTI
Dorudon	SQ_right	6	0.5122549019607843	50.108	0.2	ARCHAEO
Eubalaena	SQ_right	8	0.5612745098039216	43.7923	0.32142857142857145	MYSTI
Balaenoptera_musculus	SQ_right	6	0.517156862745098	20.1587	0.4	MYSTI
Notocetus	SQ_right	6	0.4852941176470588	25.4051	0.26666666666666666	ODON
Pakicetus	SQ_right	7	0.5147058823529412	33.4119	0.2857142857142857	ARCHAEO
Physeter	SQ_right	8	0.5606060606060606	30.5323	0.39285714285714285	ODON
Piscobalaena	SQ_right	8	0.5318627450980392	38.2226	0.25	MYSTI
Protocetidae	SQ_right	9	0.5661764705882353	67.075	0.3055555555555556	ARCHAEO
Tursiops	SQ_right	5	0.45343137254901966	44.5048	0.2	ODON
Waipatia	SQ_right	6	0.47794117647058826	45.0025	0.26666666666666666	ODON
Yamatocetus	SQ_right	7	0.5441176470588234	62.495	0.19047619047619047	MYSTI
Aetiocetus	TP_left	2	0.37598039215686285	0	1.0	MYSTI
Albertocetus	TP_left	2	0.3642156862745099	0	1.0	ODON
Balaenoptera_acutorostrata	TP_left	3	0.41666666666666674	1.46515	0.6666666666666666	MYSTI
Caperea	TP_left	2	0.37745098039215697	0	1.0	MYSTI
Dorudon	TP_left	1	0.33872549019607856	0	1.0	ARCHAEO
Eubalaena	TP_left	2	0.3833333333333334	0	1.0	MYSTI
Balaenoptera_musculus	TP_left	3	0.4215686274509804	1.27598	0.6666666666666666	MYSTI
Notocetus	TP_left	2	0.3495098039215686	0	1.0	ODON
Pakicetus	TP_left	3	0.4068627450980392	1	0.6666666666666666	ARCHAEO
Physeter	TP_left	2	0.38636363636363646	0	1.0	ODON
Piscobalaena	TP_left	3	0.4299019607843138	1.79524	0.6666666666666666	MYSTI
Protocetidae	TP_left	3	0.40637254901960795	0	1.0	ARCHAEO
Tursiops	TP_left	1	0.31078431372549026	0	0.6666666666666666	ODON
Waipatia	TP_left	1	0.3205882352941177	0	0.6666666666666666	ODON
Yamatocetus	TP_left	2	0.37745098039215697	0	1.0	MYSTI
Aetiocetus	TP_right	2	0.3759803921568628	0	1.0	MYSTI
Albertocetus	TP_right	2	0.36421568627450984	0	1.0	ODON
Balaenoptera_acutorostrata	TP_right	3	0.41666666666666674	1.46515	0.6666666666666666	MYSTI
Caperea	TP_right	2	0.3774509803921569	0	1.0	MYSTI
Dorudon	TP_right	1	0.33872549019607856	0	1.0	ARCHAEO
Eubalaena	TP_right	2	0.38333333333333336	0	1.0	MYSTI
Balaenoptera_musculus	TP_right	3	0.42156862745098045	1.27598	0.6666666666666666	MYSTI
Notocetus	TP_right	2	0.3495098039215686	0	1.0	ODON
Pakicetus	TP_right	3	0.40686274509803927	1	0.6666666666666666	ARCHAEO
Physeter	TP_right	2	0.38888888888888895	0	1.0	ODON
Piscobalaena	TP_right	3	0.4299019607843138	1.79524	0.6666666666666666	MYSTI
Protocetidae	TP_right	3	0.40637254901960795	0	1.0	ARCHAEO
Tursiops	TP_right	1	0.31078431372549026	0	0.6666666666666666	ODON
Waipatia	TP_right	1	0.32058823529411773	0	0.6666666666666666	ODON
Yamatocetus	TP_right	2	0.3774509803921569	0	1.0	MYSTI
Aetiocetus	VO	12	0.6348039215686274	133.794	0.22727272727272727	MYSTI
Albertocetus	VO	14	0.6666666666666666	172.871	0.21794871794871795	ODON
Balaenoptera_acutorostrata	VO	10	0.5980392156862746	78.606	0.2222222222222222	MYSTI
Caperea	VO	12	0.6446078431372548	89.2825	0.24242424242424243	MYSTI
Dorudon	VO	11	0.6274509803921567	80.9194	0.18181818181818182	ARCHAEO
Eubalaena	VO	12	0.6348039215686274	67.8069	0.24242424242424243	MYSTI
Balaenoptera_musculus	VO	10	0.6029411764705883	63.2293	0.2222222222222222	MYSTI
Notocetus	VO	12	0.6274509803921569	62.9951	0.32727272727272727	ODON
Pakicetus	VO	11	0.627450980392157	97.907	0.18181818181818182	ARCHAEO
Physeter	VO	12	0.6161616161616161	35.5006	0.36363636363636365	ODON
Piscobalaena	VO	12	0.6568627450980391	152.967	0.18181818181818182	MYSTI
Protocetidae	VO	11	0.6127450980392157	57.5984	0.34545454545454546	ARCHAEO
Tursiops	VO	14	0.6446078431372548	78.823	0.34615384615384615	ODON
Waipatia	VO	14	0.6446078431372548	79.7039	0.28205128205128205	ODON
Yamatocetus	VO	12	0.6348039215686274	99.9632	0.21212121212121213	MYSTI
